## Supplemental data

**Table 1: List of qPCR primers used in molecular analysis.**

| Gene name      | Oligo sequence Forward (5' to 3') | Oligo sequence Reverse (5' to 3') |
|----------------|-----------------------------------|-----------------------------------|
| Tnf $\alpha$   | AAGTTCCCAAATGGCCTCCC              | CACTTGGTGGTTTGCTACGA              |
| Il1b           | TGCCACCTTTTGACAGTGATG             | ATGTGCTGCTGCGAGATTTG              |
| Act17b         | AGCGTTTCCAGAGGGAGTTG              | CCGGTCCACACTGATGTCTT              |
| Bmp3           | TATGACAGGTACAGCGGCAG              | TTCGTTTGAGGAGTTCCTGCG             |
| Nacc1          | ACATCACAAGGGCACAGCTT              | GGCCAGTGTATTCCGGTCAA              |
| Spink3         | GGTGACTGGAAAAGAGGCTAGT            | TGAGGACAGGCTCTATGCGT              |
| Spink1         | ACGAGCAGTAAGCACAGAGATTT           | AGGAAGAAGCACCAAAGTCAG             |
| Sprr1a         | GCTCTTCTCTGAGTATTAGGACCA          | GTTTTGGGGGCACAAGGTTT              |
| Gjb2           | CATTTTCGGACCAACCCAGGA             | CTGGATGGTTGGCACTGTGT              |
| Foxa1          | AGGGTTGGATGGTTGTGTCTG             | GAGTAGGCCTCCTGCGTGT               |
| Ccl2           | CACTCACCTGCTGCTACTCA              | GCTTGGTGACAAAACTACAGC             |
| Ccl7           | CCCTGGGAAGCTGTTATCTTCA            | ATAGCCTCCTCGACCCACTT              |
| Ccl9           | GCCAGATCACACATGCAAC               | AGGACAGGCAGCAATCTGAA              |
| Ccl3           | CAGCCAGGTGTCATTTTCTGA             | AGGCATTGAGTTCAGGTCA               |
| Ccl6           | GCTGGCCTCATAAAGAAATGG             | TGTGGCATAAGAGAAGCAGCA             |
| Ccl5           | TGCTGCTTTGCCTACCTCTC              | TCCTTCGAGTGACAAACACGA             |
| Cxcl1          | TGGCTGGGATTCACCTCAAG              | AGTGTGGCTATGACTTCGGTT             |
| Cxcl2          | TGAACAAAGGCAAGGCTAACTG            | CAGGTACGATCCAGGCTTCC              |
| NFk $\beta$    | GAGCAACCAAAACAGAGGGG              | GCAGGCCCCACATAGTTGC               |
| Socs1          | CCGCCAGATGAGCCCAC                 | CCAACAGACCCCAAGGAGC               |
| Socs3          | TAGACTTCACGGCTGCCAAC              | CGGGGAGCTAGTCCCGAA                |
| IFN $\gamma$   | GAGGAACTGGCAAAAGGATGG             | TGTTGCTGATGGCCTGATTG              |
| CD40           | CCTGGACAAGCTGTGAGGATA             | CCCCGAAAATGGTGATGAGG              |
| CCR2           | AGGAGCCATACCTGTAAATGCC            | TGTGGTGAATCCAATGCCCT              |
| F4/80          | CACTTCCAAGATGGGTAAACATCC          | CTGCCATCAACTCATGATACCCT           |
| CD206          | TGGAGGCTGATTACGAGCAG              | TCCAGGTGAACCCCTCTGAA              |
| CD163          | GTGCTGGATCTCTGGTTGTA              | GGAGCGTTAGTGACAGCAGA              |
| CD11c          | TGCTGTTGGGGTTTGTCTTCTG            | CGAACTCAGCACCGTCCAT               |
| $\beta$ -actin | TTCAACACCCCAGCCATGTA              | TGTGGTACGACCAGAGGCATAC            |
| Gapdh          | TGTCAAGCTCATTTCTGGTATG            | GGCCTCTCTTGCTCAGTGTC              |
| Ppia           | TTCAACACCCCAGCCATGTA              | TGTGGTACGACCAGAGGCATAC            |

**Table 2: Full list of upregulated transcripts**

| Fold change | Gene Symbol      | Description                                                                                                                                  |
|-------------|------------------|----------------------------------------------------------------------------------------------------------------------------------------------|
| 4.285       | <b>Sly</b>       | Sycp3 like Y-linked (Sly), mRNA [NM_201530]                                                                                                  |
| 2.938       | <b>Actl7b</b>    | Actin-like 7b (Actl7b), mRNA [NM_025271]                                                                                                     |
| 2.911       | <b>Hist1h2bp</b> | Histone cluster 1, H2bp (Hist1h2bp), mRNA [NM_178202]                                                                                        |
| 2.598       |                  | mAb B.A.N4:4.57 V kappa region [mice, B cell hybridoma, BALB/c, mRNA, 300 nt]. [S60946]                                                      |
| 2.569       | <b>Krt75</b>     | Keratin 75 (Krt75), mRNA [NM_133357]                                                                                                         |
| 2.558       | <b>Bmp3</b>      | Bone morphogenetic protein 3 (Bmp3), mRNA [NM_173404]                                                                                        |
| 2.510       | <b>Nacc1</b>     | Nucleus accumbens associated 1, BEN and BTB (POZ) domain containing (Nacc1), mRNA [NM_025788]                                                |
| 2.435       | <b>Ccl2</b>      | Chemokine (C-C motif) ligand 2 (Ccl2), mRNA [NM_011333]                                                                                      |
| 2.289       | <b>Ccl7</b>      | Chemokine (C-C motif) ligand 7 (Ccl7), mRNA [NM_013654]                                                                                      |
| 2.289       | <b>Ccdc177</b>   | Coiled-coil domain containing 177 (Ccdc177), mRNA [NM_001008423]                                                                             |
| 2.283       | <b>Gjb4</b>      | Gap junction protein, beta 4 (Gjb4), mRNA [NM_008127]                                                                                        |
| 2.282       | <b>Ptges</b>     | Prostaglandin E synthase (Ptges), mRNA [NM_022415]                                                                                           |
| 2.231       | <b>Lin7b</b>     | Lin-7 homolog B (C. elegans) (Lin7b), mRNA [NM_011698]                                                                                       |
| 2.226       | <b>Mefv</b>      | Mediterranean fever (Mefv), transcript variant 1, mRNA [NM_001161790]                                                                        |
| 2.223       | <b>Neurod2</b>   | Neurogenic differentiation 2 (Neurod2), mRNA [NM_010895]                                                                                     |
| 2.219       | <b>Wnt7a</b>     | Wingless-related MMTV integration site 7A (Wnt7a), mRNA [NM_009527]                                                                          |
| 2.205       | <b>Vmn2r35</b>   | Vomerolateral 2, receptor 35 (Vmn2r35), mRNA [NM_001105067]                                                                                  |
| 2.179       | <b>Cd59b</b>     | CD59b antigen (Cd59b), mRNA [NM_181858]                                                                                                      |
| 2.172       | <b>Zfp114</b>    | Zinc finger protein 114 [Source:MGI Symbol;Acc:MGI:3037815] [ENSMUST00000086010]                                                             |
| 2.171       | <b>Ras1</b>      | RAS, dexamethasone-induced 1 (Ras1), mRNA [NM_009026]                                                                                        |
| 2.157       | <b>Gdf3</b>      | Growth differentiation factor 3 (Gdf3), mRNA [NM_008108]                                                                                     |
| 2.073       | <b>Mppe1</b>     | Metallophosphoesterase 1 (Mppe1), mRNA [NM_172630]                                                                                           |
| 2.024       | <b>Ptcd4</b>     | 13 days embryo head cDNA, RIKEN full-length enriched library, clone:3110082D06product:hypothetical protein, full insert sequence. [AK014270] |
| 1.964       | <b>Dact2</b>     | Dapper homolog 2, antagonist of beta-catenin (xenopus) (Dact2), mRNA [NM_172826]                                                             |
| 1.943       | <b>Chi31l</b>    | Chitinase 3-like 1 (Chi31l), mRNA [NM_007695]                                                                                                |
| 1.941       | <b>Tcp10b</b>    | mRNA for t-Complex Tcp-10a gene. [X58170]                                                                                                    |
| 1.940       | <b>Nuf2</b>      | NUF2, NDC80 kinetochore complex component, homolog (S. cerevisiae) (Nuf2), mRNA [NM_023284]                                                  |
| 1.928       | <b>Ccnb1</b>     | Cyclin B1 (Ccnb1), mRNA [NM_172301]                                                                                                          |
| 1.922       | <b>Fkbp11</b>    | FK506 binding protein 11 (Fkbp11), mRNA [NM_024169]                                                                                          |
| 1.903       | <b>Krtap5-5</b>  | Keratin associated protein 5-5 (Krtap5-5), mRNA [NM_001037822]                                                                               |
| 1.901       | <b>Aanat</b>     | Arylalkylamine N-acetyltransferase [Source:MGI Symbol;Acc:MGI:1328365] [ENSMUST00000132601]                                                  |
| 1.875       | <b>Glytk</b>     | Glycerate kinase (Glytk), transcript variant 1, mRNA [NM_174846]                                                                             |
| 1.872       | <b>Anks6</b>     | Ankyrin repeat and sterile alpha motif domain containing 6 (Anks6), mRNA [NM_001024136]                                                      |
| 1.862       | <b>Vmn2r33</b>   | Vomerolateral 2, receptor33 (Vmn2r33), mRNA [NM_001105065]                                                                                   |
| 1.852       | <b>Gas2l1</b>    | Growth arrest-specific 2 like 1 (Gas2l1), transcript variant beta, mRNA [NM_144560]                                                          |
| 1.852       | <b>Il1b</b>      | Interleukin 1 beta (Il1b), mRNA [NM_008361]                                                                                                  |
| 1.852       | <b>Cyp2r1</b>    | Cytochrome P450, family 2, subfamily r, polypeptide 1 (Cyp2r1), mRNA [NM_177382]                                                             |
| 1.852       | <b>Il3</b>       | Interleukin 3 (Il3), mRNA [NM_010556]                                                                                                        |
| 1.852       | <b>Sox14</b>     | SRY-box containing gene 14 (Sox14), mRNA [NM_011440]                                                                                         |
| 1.852       | <b>Dstamp</b>    | Dendrocyte expressed seven transmembrane protein (Dstamp), mRNA [NM_029422]                                                                  |
| 1.851       | <b>Mefv</b>      | Mediterranean fever (Mefv), transcript variant 3, mRNA [NM_019453]                                                                           |
| 1.845       | <b>Ctxn2</b>     | Cortexin 2 (Ctxn2), mRNA [NM_001162934]                                                                                                      |
| 1.843       | <b>Hsd3b2</b>    | hydroxy-delta-5-steroid dehydrogenase, 3 beta- and steroid delta-isomerase 2 [Source:MGI Symbol;Acc:MGI:96234] [ENSMUST00000107022]          |
| 1.827       | <b>Krtap12-1</b> | Keratin associated protein 12-1 (Krtap12-1), mRNA [NM_010670]                                                                                |
| 1.822       | <b>Gucy2f</b>    | Guanylate cyclase 2f (Gucy2f), mRNA [NM_001007576]                                                                                           |
| 1.805       | <b>Nacc2</b>     | Nucleus accumbens associated 2, BEN and BTB (POZ) domain containing (Nacc2), transcript variant 2, mRNA [NM_001037098]                       |
| 1.792       | <b>Fam69b</b>    | Family with sequence similarity 69, member B (Fam69b), mRNA [NM_019833]                                                                      |
| 1.788       | <b>Spc25</b>     | SPC25, NDC80 kinetochore complex component, homolog (S. cerevisiae) (Spc25), transcript variant 1, mRNA [NM_001199123]                       |
| 1.778       | <b>H2-Q4</b>     | Histocompatibility 2, Q region locus 4 (H2-Q4), mRNA [NM_001143689]                                                                          |
| 1.768       | <b>Ifttd1</b>    | Intermediate filament tail domain containing 1 (Ifttd1), mRNA [NM_028742]                                                                    |
| 1.768       | <b>Nei3</b>      | nei like 3 (E. coli) (Nei3), mRNA [NM_146208]                                                                                                |
| 1.756       | <b>Cnga2</b>     | Cyclic nucleotide gated channel alpha 2 (Cnga2), mRNA [NM_007724]                                                                            |
| 1.754       | <b>Pcdhb12</b>   | Protocadherin beta 12 (Pcdhb12), mRNA [NM_053137]                                                                                            |
| 1.749       | <b>Mroh1</b>     | Maestro heat-like repeat family member 1 (Mroh1), transcript variant 2, mRNA [NM_001162489]                                                  |
| 1.749       | <b>Maged2</b>    | melanoma antigen, family D, 2 [Source:MGI Symbol;Acc:MGI:1933391] [ENSMUST00000026302]                                                       |
| 1.742       | <b>Fut7</b>      | Fucosyltransferase 7 (Fut7), transcript variant 1, mRNA [NM_013524]                                                                          |
| 1.741       | <b>Zbtbd6</b>    | Kelch repeat and BTB (POZ) domain containing 6 (Zbtbd6), mRNA [NM_001034882]                                                                 |
| 1.734       | <b>Lrriq3</b>    | Leucine-rich repeats and IQ motif containing 3 (Lrriq3), mRNA [NM_028938]                                                                    |
| 1.730       | <b>Vmn2r35</b>   | Vomerolateral 2, receptor 35 (Vmn2r35), mRNA [NM_001105067]                                                                                  |
| 1.723       | <b>Acly</b>      | ATP citrate lyase (Acly), transcript variant 2, mRNA [NM_134037]                                                                             |
| 1.721       | <b>Gm5464</b>    | Predicted gene 5464 (Gm5464), mRNA [NM_001034881]                                                                                            |
| 1.715       | <b>Niacr1</b>    | Niacin receptor 1 (Niacr1), mRNA [NM_030701]                                                                                                 |
| 1.709       | <b>Cd247</b>     | CD247 antigen (Cd247), transcript variant eta, mRNA [NM_031162]                                                                              |
| 1.701       | <b>Padi3</b>     | Peptidyl arginine deiminase, type III (Padi3), mRNA [NM_011060]                                                                              |
| 1.694       | <b>Cenpm</b>     | Centromere protein M (Cenpm), transcript variant 2, mRNA [NM_178269]                                                                         |
| 1.694       | <b>Cyp19a1</b>   | Cytochrome P450, family 19, subfamily a, polypeptide 1 (Cyp19a1), mRNA [NM_007810]                                                           |
| 1.693       | <b>Gadd45a</b>   | Growth arrest and DNA-damage-inducible 45 alpha (Gadd45a), mRNA [NM_007836]                                                                  |
| 1.692       | <b>Nt5dc2</b>    | 5'-nucleotidase domain containing 2 (Nt5dc2), mRNA [NM_027289]                                                                               |
| 1.690       | <b>Atxn7l2</b>   | Ataxin 7-like 2 (Atxn7l2), mRNA [NM_175183]                                                                                                  |
| 1.689       | <b>Sfi1</b>      | Sfi1 homolog, spindle assembly associated (yeast) (Sfi1), mRNA [NM_030207]                                                                   |
| 1.679       | <b>Med28</b>     | Mediator of RNA polymerase II transcription, subunit 28 homolog (yeast) (Med28), mRNA [NM_025895]                                            |
| 1.679       | <b>Trpv1</b>     | Transient receptor potential cation channel, subfamily V, member 1 (Trpv1), mRNA [NM_001001445]                                              |
| 1.670       | <b>Med9os</b>    | Med9 opposite strand transcript (Med9os), long non-coding RNA [NR_045273]                                                                    |
| 1.668       | <b>Dmc1</b>      | DMC1 dosage suppressor of mck1 homolog, meiosis-specific homologous recombination (Dmc1), transcript variant 1, mRNA [NM_010059]             |

|       |                 |                                                                                                                                                                                                                            |
|-------|-----------------|----------------------------------------------------------------------------------------------------------------------------------------------------------------------------------------------------------------------------|
| 1.667 | <b>Skor1</b>    | SKI family transcriptional corepressor 1 (Skor1), transcript variant 1, mRNA [NM_172446]                                                                                                                                   |
| 1.664 | <b>Gcn11</b>    | Core2-GlcNAc-transferase (C2-GnT) mRNA, complete cds. [U19265]                                                                                                                                                             |
| 1.660 | <b>Tnf</b>      | Tumor necrosis factor (Tnf), transcript variant 1, mRNA [NM_013693]                                                                                                                                                        |
| 1.655 | <b>Gfra4</b>    | Glial cell line derived neurotrophic factor family receptor alpha 4 (Gfra4), transcript variant 4, mRNA [NM_001271002]                                                                                                     |
| 1.651 | <b>Rprml</b>    | Reprimo-like (Rprml), mRNA [NM_001033212]                                                                                                                                                                                  |
| 1.649 | <b>Slc5a3</b>   | Solute carrier family 5 (inositol transporters), member 3 (Slc5a3), mRNA [NM_017391]                                                                                                                                       |
| 1.646 | <b>Dtl</b>      | Denticleless homolog (Drosophila) (Dtl), mRNA [NM_029766]                                                                                                                                                                  |
| 1.640 | <b>Tk1</b>      | thymidine kinase 1 [Source:MGI Symbol:Acc:MGI:98763] [ENSMUST00000153298]                                                                                                                                                  |
| 1.632 | <b>Chad1</b>    | Chondroadherin-like (Chad1), mRNA [NM_001164320]                                                                                                                                                                           |
| 1.627 | <b>Dctd</b>     | dCMP deaminase (Dctd), transcript variant 1, mRNA [NM_178788]                                                                                                                                                              |
| 1.625 | <b>Azin1</b>    | Antizyme inhibitor 1 (Azin1), transcript variant 2, mRNA [NM_018745]                                                                                                                                                       |
| 1.622 | <b>Ssrp1</b>    | Structure specific recognition protein 1 (Ssrp1), transcript variant 1, mRNA [NM_182990]                                                                                                                                   |
| 1.618 | <b>Dppa5a</b>   | Developmental pluripotency associated 5A (Dppa5a), mRNA [NM_025274]                                                                                                                                                        |
| 1.617 | <b>Gm13710</b>  | Predicted gene 13710 (Gm13710), long non-coding RNA [NR_046046]                                                                                                                                                            |
| 1.617 | <b>Il18r1</b>   | Interleukin 18 receptor 1 (Il18r1), transcript variant 2, mRNA [NM_001161842]                                                                                                                                              |
| 1.609 | <b>Mageh1</b>   | Melanoma antigen, family H, 1 (Mageh1), mRNA [NM_023788]                                                                                                                                                                   |
| 1.597 | <b>Actg1</b>    | Actin, gamma, cytoplasmic 1 (Actg1), mRNA [NM_009609]                                                                                                                                                                      |
| 1.595 | <b>Lrrc3</b>    | Leucine rich repeat containing 3 (Lrrc3), mRNA [NM_145152]                                                                                                                                                                 |
| 1.589 | <b>Btk</b>      | Brutonagammaglobulinemia tyrosine kinase (Btk), mRNA [NM_013482]<br>ES cells cDNA, RIKEN full-length enriched library, clone:C330016E03 product:SRCRB-S4D PROTEIN homolog [Homo sapiens], full insert sequence. [AK082786] |
| 1.588 | <b>Srcrb4d</b>  |                                                                                                                                                                                                                            |
| 1.587 | <b>Prdm10</b>   | PR domain containing 10 [Source:MGI Symbol:Acc:MGI:2682952] [ENSMUST00000136144]                                                                                                                                           |
| 1.585 | <b>Recql4</b>   | RecQ protein-like 4 (Recql4), mRNA [NM_058214]                                                                                                                                                                             |
| 1.580 | <b>Mtus2</b>    | Microtubule associated tumor suppressor candidate 2 (Mtus2), mRNA [NM_029920]                                                                                                                                              |
| 1.578 | <b>Kctd11</b>   | Potassium channel tetramerisation domain containing 11 (Kctd11), mRNA [NM_153143]                                                                                                                                          |
| 1.578 | <b>Fgf21</b>    | Fibroblast growth factor 21 (Fgf21), mRNA [NM_020013]                                                                                                                                                                      |
| 1.576 | <b>Cenpn</b>    | Centromere protein N (Cenpn), mRNA [NM_028131]                                                                                                                                                                             |
| 1.569 | <b>Olfir821</b> | Olfactory receptor 821 (Olfir821), mRNA [NM_146776]                                                                                                                                                                        |
| 1.566 | <b>Uxs1</b>     | UDP-glucuronate decarboxylase 1 (Uxs1), mRNA [NM_026430]                                                                                                                                                                   |
| 1.560 | <b>Bcl11a</b>   | B cell CLL/lymphoma 11A (zinc finger protein) (Bcl11a), transcript variant 4, mRNA [NM_001242934]                                                                                                                          |
| 1.555 | <b>Gins2</b>    | GINS complex subunit 2 (Psf2 homolog) (Gins2), mRNA [NM_178856]                                                                                                                                                            |
| 1.554 | <b>Cybrd1</b>   | Cytochrome b reductase 1 (Cybrd1), mRNA [NM_028593]                                                                                                                                                                        |
| 1.549 | <b>Sgcz</b>     | Sarcoglycan zeta (Sgcz), mRNA [NM_145841]                                                                                                                                                                                  |
| 1.525 | <b>Kif4</b>     | Kinesin family member 4 (Kif4), mRNA [NM_008446]                                                                                                                                                                           |
| 1.525 | <b>Morf4l2</b>  | Mortality factor 4 like 2 (Morf4l2), transcript variant 2, mRNA [NM_001168225]                                                                                                                                             |
| 1.523 | <b>Cenph</b>    | Centromere protein H (Cenph), mRNA [NM_021886]                                                                                                                                                                             |
| 1.519 | <b>Jph3</b>     | Junctophilin 3 (Jph3), mRNA [NM_020605]                                                                                                                                                                                    |
| 1.515 | <b>Pgpep1</b>   | Pyroglutamyl-peptidase I (Pgpep1), mRNA [NM_023217]                                                                                                                                                                        |
| 1.510 | <b>Tmco3</b>    | Transmembrane and coiled-coil domains 3 (Tmco3), mRNA [NM_172282]                                                                                                                                                          |
| 1.506 | <b>Spag5</b>    | Sperm associated antigen 5 (Spag5), mRNA [NM_017407]                                                                                                                                                                       |
| 1.504 | <b>Mutyh</b>    | Adenine-DNA glycosylase mRNA, complete cds. [AY007717]                                                                                                                                                                     |
| 1.502 | <b>Cd300e</b>   | CD300e antigen (Cd300e), mRNA [NM_172050]                                                                                                                                                                                  |
| 1.500 | <b>Slc29a3</b>  | Solute carrier family 29 (nucleoside transporters), member 3 (Slc29a3), mRNA [NM_023596]                                                                                                                                   |
| 1.467 | <b>Xkr5</b>     | X Kell blood group precursor-related family, member 5 (Xkr5), transcript variant 2, mRNA [NM_176951]                                                                                                                       |
| 1.458 | <b>Gsted</b>    | Glutathione S-transferase, C-terminal domain containing (Gsted), mRNA [NM_026231]                                                                                                                                          |
| 1.454 | <b>Tssc1</b>    | Tumor suppressing subtransferable candidate 1 (Tssc1), mRNA [NM_201357]                                                                                                                                                    |
| 1.445 | <b>Dzip1</b>    | DAZ interacting protein 1 (Dzip1), mRNA [NM_025943]                                                                                                                                                                        |
| 1.413 | <b>Bpifb6</b>   | BPI fold containing family B, member 6 (Bpifb6), mRNA [NM_199303]                                                                                                                                                          |
| 1.392 | <b>Pgbd1</b>    | PiggyBac transposable element derived 1 (Pgbd1), transcript variant 1, mRNA [NM_001162919]                                                                                                                                 |

**Table 3: Full list of downregulated transcripts**

| Fold change | Gene Symbol      | Gene Description                                                                                                  |
|-------------|------------------|-------------------------------------------------------------------------------------------------------------------|
| 24.76       | <b>Spink3</b>    | Serine peptidase inhibitor, Kazal type 3 (Spink3), mRNA [NM_009258]                                               |
| 11.25       | <b>Spinkl</b>    | Serine protease inhibitor, Kazal type-like (Spinkl), mRNA [NM_183123]                                             |
| 9.46        | <b>Sprr1a</b>    | Small proline-rich protein 1A (Sprr1a), mRNA [NM_009264]                                                          |
| 8.87        | <b>Gsdma</b>     | Gasdermin A (Gsdma), mRNA [NM_021347]                                                                             |
| 8.22        | <b>Foxa1</b>     | Forkhead box A1 (Foxa1), mRNA [NM_008259]                                                                         |
| 5.29        | <b>Gjb2</b>      | Gap junction protein, beta 2 (Gjb2), mRNA [NM_008125]                                                             |
| 3.65        | <b>Fam3b</b>     | Family with sequence similarity 3, member B (Fam3b), mRNA [NM_020622]                                             |
| 3.23        | <b>Cyp2c37</b>   | Cytochrome P450, family 2, subfamily c, polypeptide 37 (Cyp2c37), mRNA [NM_010001]                                |
| 3.15        | <b>Tnnt2</b>     | Troponin T2, cardiac (Tnnt2), transcript variant 9, mRNA [NM_011619]                                              |
| 3.12        | <b>Ankrd1</b>    | Ankyrin repeat domain 1 (cardiac muscle) (Ankrd1), mRNA [NM_013468]                                               |
| 3.06        | <b>Iglv1</b>     | Clone 46s58 immunoglobulin lambda chain mRNA, partial cds. [AY170578]                                             |
| 2.80        | <b>Upb1</b>      | Ureidopropionase, beta (Upb1), mRNA [NM_133995]                                                                   |
| 2.71        | <b>Fam25c</b>    | Family with sequence similarity 25, member C (Fam25c), mRNA [NM_183278]                                           |
| 2.68        | <b>Pla2g12b</b>  | Phospholipase A2, group XIIb (Pla2g12b), mRNA [NM_023530]                                                         |
| 2.46        | <b>Igf2</b>      | Insulin-like growth factor binding protein 2 (Igf2), mRNA [NM_008342]                                             |
| 2.41        | <b>Pitx2</b>     | Paired-like homeodomain transcription factor 2 (Pitx2), transcript variant 3, mRNA [NM_001042502]                 |
| 2.04        | <b>Ces2b</b>     | Carboxyesterase 2B (Ces2b), mRNA [NM_198171]                                                                      |
| 1.99        | <b>Mns1</b>      | Meiosis-specific nuclear structural protein 1 (Mns1), mRNA [NM_008613]                                            |
| 1.88        | <b>Dixdc1</b>    | DIX domain containing 1 (Dixdc1), mRNA [NM_178118]                                                                |
| 1.87        | <b>Pik3c2b</b>   | Bromodomain and WD repeat domain containing 1 (Pik3c2b), mRNA [NM_001099276]                                      |
| 1.81        | <b>Abcg5</b>     | ATP-binding cassette, sub-family G (WHITE), member 5 (Abcg5), mRNA [NM_031884]                                    |
| 1.77        | <b>Ddit4</b>     | DNA-damage-inducible transcript 4 (Ddit4), mRNA [NM_029083]                                                       |
| 1.72        | <b>Amica1</b>    | Adhesion molecule, interacts with CXADR antigen 1 (Amica1), mRNA [NM_001005421]                                   |
| 1.71        | <b>Slc4a4</b>    | Solute carrier family 4 (anion exchanger), member 4 (Slc4a4), transcript variant 1, mRNA [NM_018760]              |
| 1.68        | <b>Slc4a4</b>    | Solute carrier family 4 (anion exchanger), member 4 (Slc4a4), transcript variant 1, mRNA [NM_018760]              |
| 1.68        | <b>Igf2</b>      | Insulin-like growth factor 2 (Igf2), transcript variant 1, mRNA [NM_010514]                                       |
| 1.67        | <b>Cyp2f2</b>    | Cytochrome P450, family 2, subfamily f, polypeptide 2 (Cyp2f2), mRNA [NM_007817]                                  |
| 1.66        | <b>Brwd1</b>     | Bromodomain and WD repeat domain containing 1 (Brwd1), transcript variant 2, mRNA [NM_001103179]                  |
| 1.65        | <b>Wnt9b</b>     | Wingless-type MMTV integration site 9B (Wnt9b), mRNA [NM_011719]                                                  |
| 1.64        | <b>Sgk1</b>      | Serum/glucocorticoid regulated kinase 1 (Sgk1), transcript variant 1, mRNA [NM_001161845]                         |
| 1.63        | <b>Trp53inp1</b> | Transformation related protein 53 inducible nuclear protein 1 (Trp53inp1), transcript variant 1, mRNA [NM_021897] |
| 1.61        | <b>Fam180a</b>   | Family with sequence similarity 180, member A (Fam180a), mRNA [NM_173375]                                         |
| 1.61        | <b>Abcb4</b>     | ATP-binding cassette, sub-family B (MDR/TAP), member 4 (Abcb4), mRNA [NM_008830]                                  |
| 1.59        | <b>Cryaa</b>     | Crystallin, alpha A (Cryaa), transcript variant 1, mRNA [NM_001278569]                                            |
| 1.58        | <b>Vmn1r217</b>  | Vomer nasal 1 receptor 217 (Vmn1r217), mRNA [NM_134239]                                                           |
| 1.57        | <b>Olf190</b>    | Olfactory receptor 190 (Olf190), mRNA [NM_146397]                                                                 |
| 1.57        | <b>Gaa</b>       | Glucosidase, alpha, acid [Source:MGI Symbol;Acc:MGI:95609] [ENSMUST00000106258]                                   |
| 1.56        | <b>Kitl</b>      | Kit ligand (Kitl), mRNA [NM_013598]                                                                               |
| 1.56        | <b>Plcx2</b>     | Phosphatidylinositol-specific phospholipase C, X domain containing 2 (Plcx2), mRNA [NM_001134480]                 |
| 1.54        | <b>Gnrhr</b>     | Gonadotropin releasing hormone receptor (Gnrhr), mRNA [NM_010323]                                                 |
| 1.53        | <b>Akap13</b>    | A kinase (PRKA) anchor protein 13 (Akap13), mRNA [NM_029332]                                                      |
| 1.52        | <b>Cyp2d11</b>   | Cytochrome P450, family 2, subfamily d, polypeptide 11 (Cyp2d11), mRNA [NM_001104531]                             |
| 1.51        | <b>Col1a1</b>    | Collagen, type I, alpha 1 (Col1a1), mRNA [NM_007742]                                                              |
| 1.50        | <b>Tead1</b>     | TEA domain family member 1 (Tead1), transcript variant 1, mRNA [NM_001166584]                                     |
| 1.50        | <b>Slc12a2</b>   | Solute carrier family 12, member 2 (Slc12a2), mRNA [NM_009194]                                                    |
| 1.50        | <b>Wdr92</b>     | WD repeat domain 92 (Wdr92), mRNA [NM_178909]                                                                     |
| 1.49        | <b>Il31ra</b>    | Interleukin 31 receptor A (Il31ra), mRNA [NM_139299]                                                              |
| 1.47        | <b>Fam107a</b>   | Family with sequence similarity 107, member A (Fam107a), mRNA [NM_183187]                                         |
| 1.46        | <b>H2-M9</b>     | Histocompatibility 2, M region locus 9 (H2-M9), mRNA [NM_008205]                                                  |
| 1.45        | <b>Il2rb</b>     | Interleukin 2 receptor, beta chain (Il2rb), mRNA [NM_008368]                                                      |
| 1.44        | <b>Scrt2</b>     | Scratch homolog 2, zinc finger protein (Drosophila) (Scrt2), mRNA [NM_001160410]                                  |
| 1.43        | <b>Npnt</b>      | Nephronectin (Npnt), transcript variant 1, mRNA [NM_033525]                                                       |
| 1.38        | <b>Sord</b>      | Sorbitol dehydrogenase (Sord), mRNA [NM_146126]                                                                   |

**Table 4: Ingenuity Pathway Analysis enriched with upregulated transcripts.**

| <b>Ingenuity Canonical Pathways</b>                                                                   | <b>p-value</b> | <b>Molecules</b>           |
|-------------------------------------------------------------------------------------------------------|----------------|----------------------------|
| Graft-versus-Host Disease Signaling                                                                   | 2.14E-03       | HLA-B,IL1B,TNF             |
| Type I Diabetes Mellitus Signaling                                                                    | 3.09E-03       | CD247,HLA-B,IL1B,TNF       |
| Agranulocyte Adhesion and Diapedesis                                                                  | 3.72E-03       | CCL7,Ccl2,IL1B,TNF,ACTG1   |
| TREM1 Signaling                                                                                       | 4.37E-03       | CCL7,IL1B,TNF              |
| Differential Regulation of Cytokine Production in Macrophages and T Helper Cells by IL-17A and IL-17F | 4.37E-03       | IL1B,TNF                   |
| Acetyl-CoA Biosynthesis III (from Citrate)                                                            | 5.50E-03       | ACLY                       |
| Differential Regulation of Cytokine Production in Intestinal Epithelial Cells by IL-17A and IL-17F    | 7.24E-03       | IL1B,TNF                   |
| Role of Osteoblasts, Osteoclasts and Chondrocytes in Rheumatoid Arthritis                             | 7.76E-03       | WNT7A,BMP3,IL1B,TNF,IL18R1 |
| UDP-D-xylose and UDP-D-glucuronate Biosynthesis                                                       | 0.01           | UXS1                       |
| FXR/RXR Activation                                                                                    | 0.01           | CYP19A1,IL1B,TNF           |
| Crosstalk between Dendritic Cells and Natural Killer Cells                                            | 0.01           | HLA-B,TNF,ACTG1            |
| Communication between Innate and Adaptive Immune Cells                                                | 0.01           | HLA-B,IL1B,TNF             |
| Granulocyte Adhesion and Diapedesis                                                                   | 0.02           | CCL7,Ccl2,IL1B,TNF         |
| Airway Inflammation in Asthma                                                                         | 0.02           | TNF                        |
| 1,25-dihydroxyvitamin D3 Biosynthesis                                                                 | 0.02           | CYP2R1                     |
| Role of Hypercytokinemia/hyperchemokineemia in the Pathogenesis of Influenza                          | 0.03           | IL1B,TNF                   |
| MSP-ROn Signaling Pathway                                                                             | 0.03           | TNF,ACTG1                  |
| Role of IL-17F in Allergic Inflammatory Airway Diseases                                               | 0.03           | CCL7,IL1B                  |
| IL-6 Signaling                                                                                        | 0.03           | CYP19A1,IL1B,TNF           |
| Protein Citrullination                                                                                | 0.03           | PADI3                      |
| LXR/RXR Activation                                                                                    | 0.03           | CCL7,IL1B,TNF              |
| Serotonin and Melatonin Biosynthesis                                                                  | 0.03           | AANAT                      |
| Systemic Lupus Erythematosus Signaling                                                                | 0.04           | CD247,HLA-B,IL1B,TNF       |
| Role of Cytokines in Mediating Communication between Immune Cells                                     | 0.04           | IL1B,TNF                   |
| Airway Pathology in Chronic Obstructive Pulmonary Disease                                             | 0.04           | TNF                        |
| Prostanoid Biosynthesis                                                                               | 0.05           | PTGES                      |
| Salvage Pathways of Pyrimidine Deoxyribonucleotides                                                   | 0.05           | TK1                        |
| IL-10 Signaling                                                                                       | 0.05           | IL1B,TNF                   |

**Table 5: Ingenuity Pathway Analysis enriched with downregulated transcripts.**

| <b>Ingenuity Canonical Pathways</b>                                       | <b>p-value</b> | <b>Molecules</b>           |
|---------------------------------------------------------------------------|----------------|----------------------------|
| Bupropion Degradation                                                     | 4.57E-05       | CYP2D6,CYP2F1,CYP2C18      |
| Acetone Degradation I (to Methylglyoxal)                                  | 5.13E-05       | CYP2D6,CYP2F1,CYP2C18      |
| Estrogen Biosynthesis                                                     | 1.45E-04       | CYP2D6,CYP2F1,CYP2C18      |
| Nicotine Degradation III                                                  | 3.72E-04       | CYP2D6,CYP2F1,CYP2C18      |
| Melatonin Degradation I                                                   | 4.37E-04       | CYP2D6,CYP2F1,CYP2C18      |
| Superpathway of Melatonin Degradation                                     | 5.62E-04       | CYP2D6,CYP2F1,CYP2C18      |
| Nicotine Degradation II                                                   | 5.89E-04       | CYP2D6,CYP2F1,CYP2C18      |
| Aldosterone Signaling in Epithelial Cells                                 | 7.59E-04       | PIK3C2B,SGK1,SLC12A2,CRYAA |
| FXR/RXR Activation                                                        | 1.62E-03       | ABCG5,ABCB4,FOXA1          |
| Sorbitol Degradation I                                                    | 2.69E-03       | SORD                       |
| Glioblastoma Multiforme Signaling                                         | 7.24E-03       | PIK3C2B,IGF2,WNT9B         |
| IL-2 Signaling                                                            | 8.91E-03       | PIK3C2B,IL2RB              |
| Uracil Degradation II (Reductive)                                         | 0.01           | UPB1                       |
| Thymine Degradation                                                       | 0.01           | UPB1                       |
| IL-15 Signaling                                                           | 0.01           | PIK3C2B,IL2RB              |
| Role of JAK1 and JAK3 in $\hat{I}^3c$ Cytokine Signaling                  | 0.01           | PIK3C2B,IL2RB              |
| Growth Hormone Signaling                                                  | 0.01           | PIK3C2B,IGF2               |
| VEGF Family Ligand-Receptor Interactions                                  | 0.02           | PIK3C2B,PLA2G12B           |
| Acute Myeloid Leukemia Signaling                                          | 0.02           | KITLG,PIK3C2B              |
| Role of Osteoblasts, Osteoclasts and Chondrocytes in Rheumatoid Arthritis | 0.02           | COL1A1,PIK3C2B,WNT9B       |
| Melanocyte Development and Pigmentation Signaling                         | 0.02           | KITLG,PIK3C2B              |
| Glioma Signaling                                                          | 0.03           | PIK3C2B,IGF2               |
| IGF-1 Signaling                                                           | 0.03           | PIK3C2B,IGFBP2             |
| p53 Signaling                                                             | 0.03           | PIK3C2B,TP53INP1           |
| Telomerase Signaling                                                      | 0.03           | PIK3C2B,IL2RB              |
| Hematopoiesis from Multipotent Stem Cells                                 | 0.03           | KITLG                      |
| Glycogen Degradation III                                                  | 0.03           | GAA                        |
| iCOS-iCOSL Signaling in T Helper Cells                                    | 0.03           | PIK3C2B,IL2RB              |
| Fc Epsilon RI Signaling                                                   | 0.03           | PIK3C2B,PLA2G12B           |
| Role of NANOG in Mammalian Embryonic Stem Cell Pluripotency               | 0.04           | PIK3C2B,WNT9B              |
| CCR3 Signaling in Eosinophils                                             | 0.04           | PIK3C2B,PLA2G12B           |
| IL-6 Signaling                                                            | 0.04           | COL1A1,PIK3C2B             |
| Sperm Motility                                                            | 0.04           | SLC12A2,PLA2G12B           |
| Atherosclerosis Signaling                                                 | 0.04           | COL1A1,PLA2G12B            |
| Insulin Receptor Signaling                                                | 0.05           | PIK3C2B,SGK1               |
| Ovarian Cancer Signaling                                                  | 0.05           | PIK3C2B,WNT9B              |
| Human Embryonic Stem Cell Pluripotency                                    | 0.05           | PIK3C2B,WNT9B              |
| Hepatic Cholestasis                                                       | 0.05           | ABCG5,ABCB4                |
